# Supplementary material for: Erfahrungen mit der orthopädischen Einlagenversorgung – Eine Querschnittsstudie
Source: Springer Nature journal article supplement (doi:10.1007/s00132-024-04476-9), 2024-02-20
Supplement: MOESM1 [file 26753566]

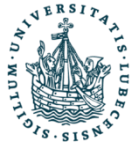

UNIVERSITÄT ZU LÜBECK

## **Orthopädische Einlagen-eine Befragung unter Orthopädietechniker\*innen**

Sehr geehrte Damen und Herren,

das Institut für Allgemeinmedizin des Universitätsklinikums Schleswig-Holstein am Campus Lübeck lädt Sie ein, an einer Befragung zu **orthopädischen Einlagen** teilzunehmen.

Durch Ihre Angaben helfen Sie uns, einen Überblick über die Verordnung und Herstellung orthopädischer Einlagen zu bekommen.

Die Teilnahme an der Befragung wird etwa 10 Minuten dauern. Mit dem Zurücksenden des Fragebogens willigen Sie ein, dass Ihre Angaben durch das Institut für Allgemeinmedizin ausgewertet und publiziert werden dürfen. Das Ausfüllen des Fragebogens erfolgt anonym. Dritte erhalten keine Einsicht in die Originalunterlagen.

**Vielen Dank für Ihre Unterstützung!**

**1a. Wie häufig erhalten Sie eine Verordnung zur Herstellung von orthopädischen Einlagen in einem durchschnittlichen Monat?**

Angabe: \_\_\_\_\_

**1b. Wie viel Prozent der Verordnungen sind davon Folgeverordnungen?**

Angabe:    %

**2. Für welche Altersgruppe erstellen Sie am häufigsten Einlagen? (eine Nennung möglich)**

- Kinder (bis 12 Jahre)
- Jugendliche (13-18 Jahre)
- junge Erwachsene (19-25 Jahre)
- Erwachsene (26-65 Jahre)
- Senioren (über 65 Jahre)

**3. Wie viel Prozent der Verordnungen erfolgen durch ...**

Hausarzt\*innen:    %

Orthopäd\*innen:    %

Pädiater\*innen:    %

Neurolog\*innen:    %

Sonstige, und zwar: \_\_\_\_\_

**4. Welche der folgenden Aspekte berücksichtigen Sie bei der Herstellung orthopädischer Einlagen? (Mehrfachnennungen möglich)**

|                          |                                 |
|--------------------------|---------------------------------|
| <input type="checkbox"/> | Ich erhebe die Anamnese.        |
| <input type="checkbox"/> | Ich führe die Inspektion durch. |
| <input type="checkbox"/> | Ich führe die Palpation durch.  |

|                          |                                                              |
|--------------------------|--------------------------------------------------------------|
| <input type="checkbox"/> | Ich beachte die Alltagsschuhe.                               |
| <input type="checkbox"/> | Ich führe Beweglichkeitstests durch.                         |
| <input type="checkbox"/> | Ich schaue mir den Gang der Patient*innen an.                |
| <input type="checkbox"/> | Ich führe eine Fußdruckmessung (z.B. Pedobarographie) durch. |
| <input type="checkbox"/> | Ich führe eine Messung der Bodenreaktionskräfte durch.       |
| <input type="checkbox"/> | Ich führe einen Trittschaumabdruck durch.                    |
| <input type="checkbox"/> | Ich erstelle einen Fußabdruck mit Papier und Tinte.          |
| <input type="checkbox"/> | Ich erstelle einen Gipsabdruck.                              |
| <input type="checkbox"/> | Ich beziehe die Wirtschaftlichkeit mit ein.                  |
| <input type="checkbox"/> | Ich halte Rücksprache mit den verordneten Ärzt*innen.        |
| <input type="checkbox"/> | Sonstiges, und zwar:                                         |

**5. Welches Material für eine Einlage bei der Indikation „Plattfuß“ wird am häufigsten verordnet? (Mehrfachnennungen möglich)**

- Kork
- Leder
- thermoplastische Kunststoffe
- Faserverbundwerkstoffe
- Anderes Material, und zwar: \_\_\_\_\_

**6. Wie häufig halten Sie sich an die ärztlichen Vorgaben für die Herstellung von Einlagen?**

- 
- immer       nie

**7. Von welchen Faktoren machen Sie es abhängig, inwieweit Sie sich an die ärztlichen Vorgaben halten? (Mehrfachnennungen möglich)**

|                          |                                      |                          |                                                  |                          |                                   |
|--------------------------|--------------------------------------|--------------------------|--------------------------------------------------|--------------------------|-----------------------------------|
| <input type="checkbox"/> | Kompetenz der verordneten Ärzt*innen | <input type="checkbox"/> | Kooperationsfähigkeit der verordneten Ärzt*innen | <input type="checkbox"/> | Meine technischen Erfahrungswerte |
|--------------------------|--------------------------------------|--------------------------|--------------------------------------------------|--------------------------|-----------------------------------|



**11. Was schätzen Sie: Wie viel Prozent der Effektstärke einer Einlagenverordnung liegt an spezifischen Effekten der Einlage? (Im Gegensatz zu unspezifischen Effekten („Placeboeffekte“))**

Angabe:    %

**12. Welche ergänzenden Therapiemaßnahmen empfehlen Sie zusätzlich zu einer Einlagenverordnung?**

- Ich empfehle keine weiteren Therapiemaßnahmen.
- Ich empfehle weitere Therapiemaßnahmen.

Bitte beschreiben Sie die „weiteren Therapiemaßnahmen“ genauer:

---

**13. In welchen Fällen suchen Sie ggf. den Austausch mit anderen Berufsgruppen im Zusammenhang mit Einlagenverordnungen? (Mehrfachnennungen möglich)**

|                          |                                 |                          |                              |                          |                                      |
|--------------------------|---------------------------------|--------------------------|------------------------------|--------------------------|--------------------------------------|
| <input type="checkbox"/> | Notwendige Verordnungskorrektur | <input type="checkbox"/> | Notwendige Einlagenkorrektur | <input type="checkbox"/> | Brainstorming bei komplexeren Fällen |
| <input type="checkbox"/> | Ich suche keinen Austausch.     | <input type="checkbox"/> | Anderes Thema und zwar:      |                          |                                      |

**14. Welche Optimierungen bezüglich Einlagenverordnungen würden Sie am meisten begrüßen? (bitte wählen Sie maximal drei Aspekte aus)**

|                          |                                                                                            |
|--------------------------|--------------------------------------------------------------------------------------------|
| <input type="checkbox"/> | Vorhandensein eines definierten Behandlungspfades im Zusammenhang mit Einlagenverordnungen |
| <input type="checkbox"/> | Mehr Studien zur Evidenz von Einlagen                                                      |
| <input type="checkbox"/> | Standardisierte Leitlinien für Einlagenverordnungen                                        |
| <input type="checkbox"/> | Optimierung der Therapieadhärenz <sup>1</sup> der Patient*innen                            |
| <input type="checkbox"/> | Keine Zuzahlung der Patient*innen                                                          |
| <input type="checkbox"/> | Standardisierte Einlagenfertigung der Orthopädietechniker*innen                            |
| <input type="checkbox"/> | Etablierung der Einlagenversorgung in die Ausbildung                                       |

|                          |                                                                         |
|--------------------------|-------------------------------------------------------------------------|
| <input type="checkbox"/> | Industriefreie interdisziplinäre Fortbildungen für Einlagenversorgungen |
| <input type="checkbox"/> | Optimierte interdisziplinäre Zusammenarbeit                             |
| <input type="checkbox"/> | Einheitlicher Vergütungs- und Indikationskatalog der Krankenkassen      |
| <input type="checkbox"/> | Übernahme aller Kosten durch die Krankenkassen                          |
| <input type="checkbox"/> | Sonstiges, und zwar:                                                    |

<sup>1</sup> Einhaltung der gemeinsam von Patient\*innen und Ärzt\*innen verabredeten Therapieziele

## Angaben zur Person

I. Ich bin...  männlich  weiblich  divers

II. In welchem Jahr wurden Sie geboren?

   

III. Wo praktizieren Sie?

in der Stadt  auf dem Land

IV. In welchem Bundesland sind Sie tätig?

Schleswig-Holstein  Niedersachsen

V. Seit wie vielen Jahren praktizieren Sie insgesamt?

 

**Welcher Aspekt zum Thema Einlagenverordnung ist Ihnen noch wichtig, den wir in dieser Befragung bisher nicht angesprochen haben?**

(Bitte deutlich schreiben!)

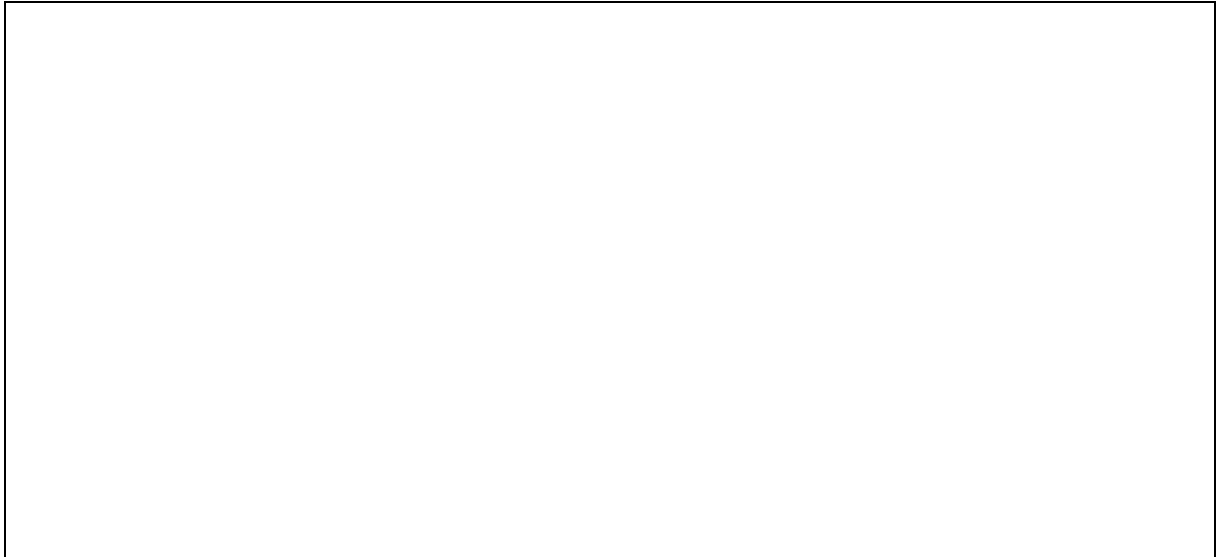

**Vielen Dank für Ihre Teilnahme!**
